# Supplementary material
Source: PubMed Central journal article supplement (PMC5509416)
Supplement: NIHMS872919-supplement-Supplemental.pdf [file NIHMS872919-supplement-Supplemental.pdf]

## Supplementary Materials for

### **IL-10 induces a STAT3-dependent autoregulatory loop in T<sub>H</sub>2 cells that promotes Blimp-1 restriction of cell expansion via antagonism of STAT5 target genes**

Amanda C. Poholek,\* Dragana Jankovic, Alejandro V. Villarino, Franziska Petermann, Angela Hettinga, Dror S. Shouval, Scott B. Snapper, Susan M. Kaech, Stephen R. Brooks, Golnaz Vahedi, Alan Sher, Yuka Kanno, John J. O'Shea\*

\*Corresponding author. Email: poholeka@pitt.edu (A.C.P.); john.oshea@nih.gov (J.J.O.)

Published 11 November 2016, *Sci. Immunol.* **1**, eaaf8612 (2016)

DOI: 10.1126/sciimmunol.aaf8612

#### **The PDF file includes:**

- Fig. S1. Expression of Blimp-1 in T cell subsets in vitro.
- Fig. S2. The IL-12–STAT4–T-bet axis controls Blimp-1 expression in T<sub>H</sub>1 cells.
- Fig. S3. IL-10 regulation of T<sub>H</sub>1 and T<sub>H</sub>2 cells.
- Fig. S4. T<sub>H</sub>2 differentiation is normal in the absence of STAT3.
- Fig. S5. The absence of IL-10 signaling on T cells does not affect T<sub>H</sub>2 cell differentiation in vivo.
- Fig. S6. Transduction of Blimp-1 GFP-expressing retrovirus.
- Fig. S7. Model of IL-10–driven Blimp-1 expression via STAT3 in T<sub>H</sub>2 cells to promote cell death.
- Fig. S8. Representative gating strategies.
- Table S1. Flow cytometry antibodies.
- Table S2. Gene lists for GSEA analysis.
- Table S3. ChIP-qPCR custom-designed SYBR primers.

**Other Supplementary Material for this manuscript includes the following:**  
(available at [immunology.sciencemag.org/cgi/content/full/1/5/eaaf8612/DC1](http://immunology.sciencemag.org/cgi/content/full/1/5/eaaf8612/DC1))

Table S4. Excel file containing source data for Figs. 1, 3, 4, and 5.

## Supplementary Materials

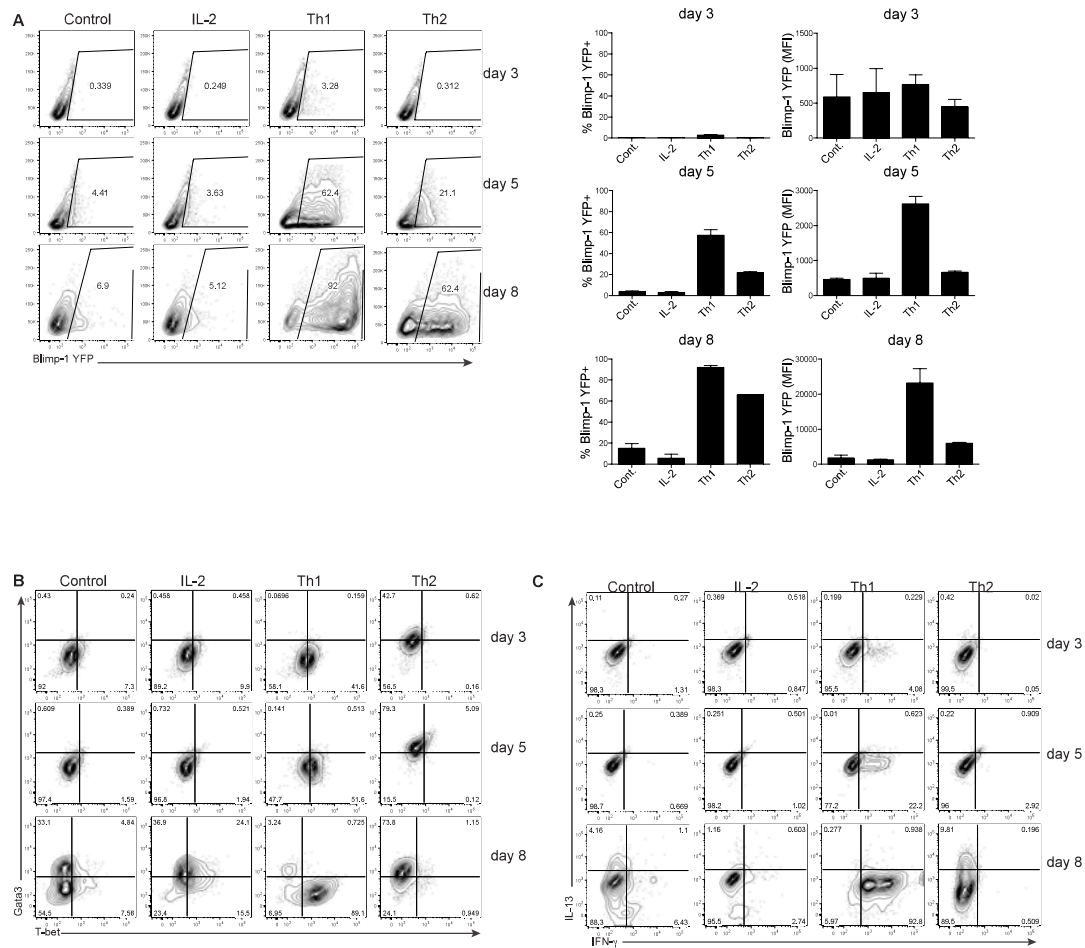

### Supplementary Figure 1: Expression of Blimp-1 in T cell subsets in vitro.

A) Expression of Blimp-1 (YFP) in sorted naïve CD4<sup>+</sup> from Blimp-1 YFP reporter mice. T cells activated with plate-bound  $\alpha$ -CD3 and  $\alpha$ -CD28 under the following indicated conditions: Control - anti-IFN- $\gamma$ , anti-IL-4; IL-2 - anti-IFN- $\gamma$ , anti-IL-4, IL-2; Th1 - anti-IL-4, IL-12; Th2 - anti-IFN- $\gamma$ , IL-4. Time course of Blimp-1 expression, percent and mean fluorescence intensity (MFI) shown in graphs on right, data are represented as mean  $\pm$  SD (n=2) and are representative of three independent experiments. B, C) Expression of GATA3 and T-bet (B) or IL-13 and IFN- $\gamma$  (C) in cells shown in A.

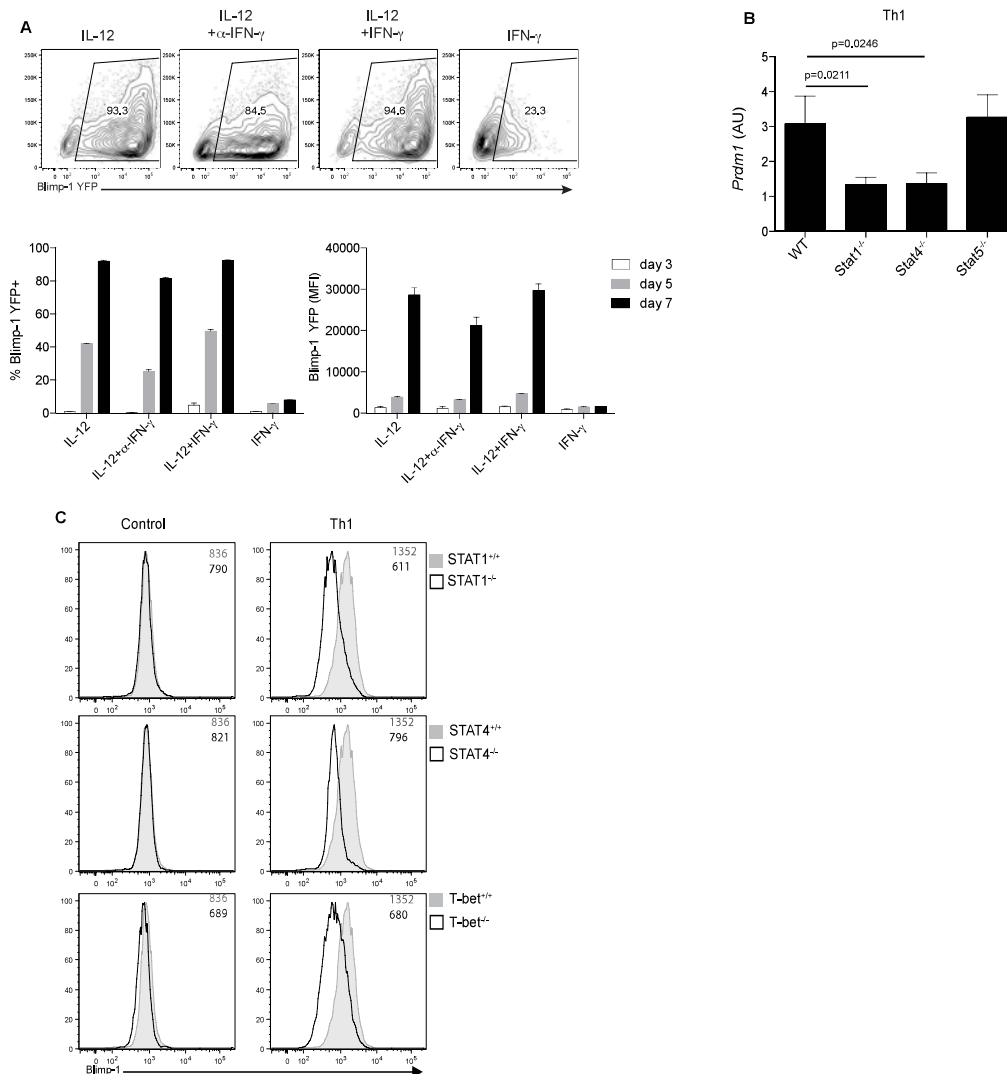

**Supplementary Figure 2: The IL-12–STAT4–T-bet axis controls Blimp-1 expression in T<sub>H</sub>1 cells.**

Expression of Blimp-1 (YFP) in sorted naive CD4<sup>+</sup> T cells activated with plate-bound  $\alpha$ -CD3 and  $\alpha$ -CD28 under previously indicated conditions. In addition,  $\alpha$ -IL-4 was added to all conditions, along with the antibodies and cytokines indicated above the figures. A) Expression of YFP at day 8 under indicated conditions, percent YFP<sup>+</sup> cells and MFI are depicted below at indicated time points. Data are represented as mean  $\pm$  SD (n=2) and are representative of two independent experiments. B) Expression of Blimp-1 mRNA measured by qPCR in STAT<sup>+/+</sup> or STAT<sup>-/-</sup> Th1 cells at day 8 (normalized to  $\beta$ -actin) Data are represented as mean  $\pm$  SD n = 2. C) Expression of Blimp-1 protein measured by intracellular flow cytometry in STAT<sup>+/+</sup> or STAT1<sup>-/-</sup>, STAT4<sup>-/-</sup> or T-bet<sup>-/-</sup> Th1 cells at day 7. Geometric MFI of YFP is shown in top right corner of each flow plot. Data are representative of three independent experiments.

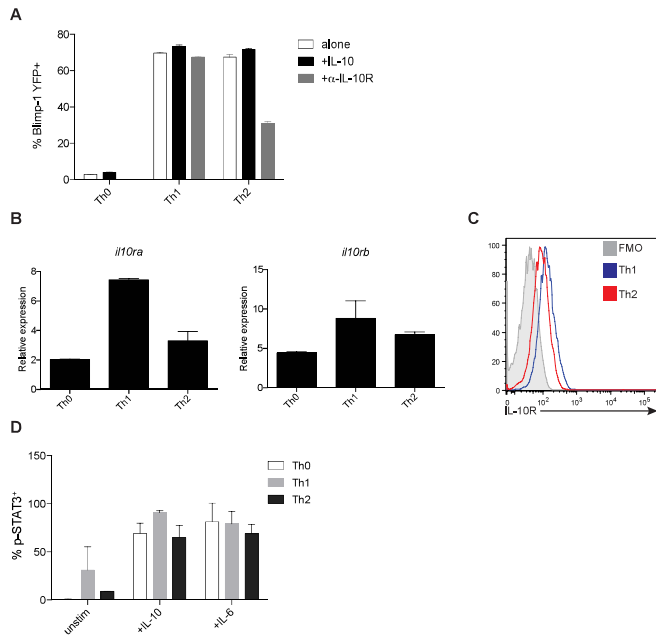

**Supplementary Figure 3: IL-10 regulation of TH1 and TH2 cells.**

A) Expression of YFP in T cells at day 8 under indicated conditions with or without the addition of IL-10 (10 ng/ml) or α-IL-10R (10 ug/ml) throughout the culture. Data are representative of three independent experiments. B) Expression of *il10ra* and *il10rb* measured by qPCR in indicated cells cultured for 5 days. Data are representative of three independent experiments. C) Expression of IL-10R by flow cytometry of cells in B. Data are representative of three independent experiments. D) Expression of phospho-STAT3 in indicated T cells stimulated with indicated cytokines for 30 mins after five days of differentiation. Data are representative of three independent experiments.

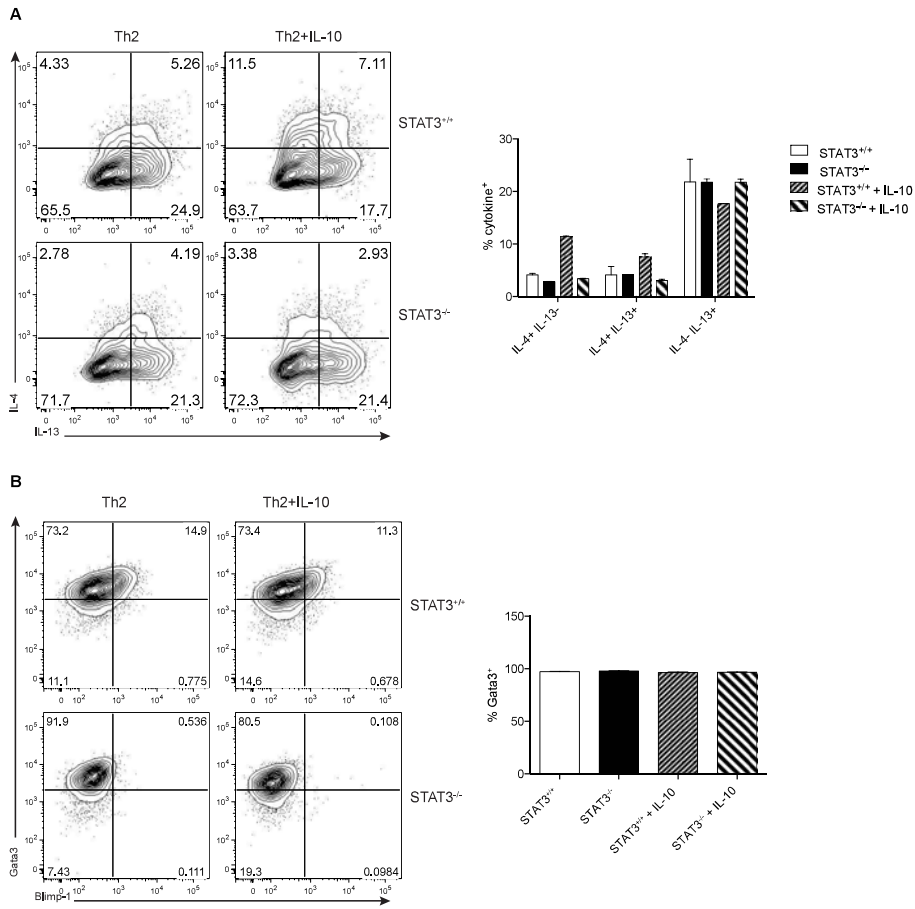

**Supplementary Figure 4: T<sub>H</sub>2 differentiation is normal in the absence of STAT3.**

A) Expression of IL-4 and IL-13 in STAT3<sup>+/+</sup> or STAT3<sup>-/-</sup> Th2 cells cultured with or without exogenous IL-10 for 7 days in vitro. Percentage of cytokine positive cells is graphed at right and represented as mean  $\pm$  SD n = 2. Data are representative of two independent experiments. B) Expression of GATA3 and Blimp-1 in STAT3<sup>+/+</sup> or STAT3<sup>-/-</sup> Th2 cells cultured with or without exogenous IL-10 for 7 days in vitro. Percentage of GATA3<sup>+</sup> positive cells is graphed at right and represented as mean  $\pm$  SD n = 2. Data are representative of two independent experiments.

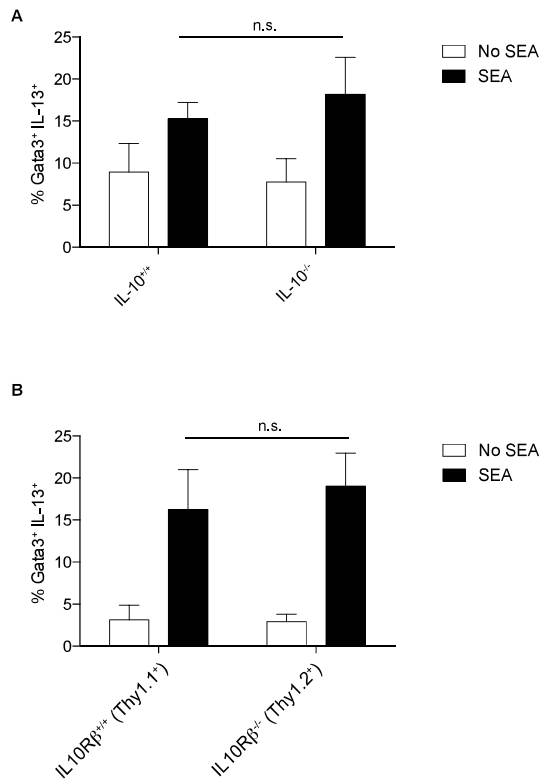

**Supplementary Figure 5: The absence of IL-10 signaling on T cells does not affect Th2 cell differentiation in vivo.**

A) Percent of Th2 cells (Gata3<sup>+</sup> IL-13<sup>+</sup>) isolated from IL10<sup>+/+</sup> or IL10<sup>-/-</sup> hosts nine days p.i. with SEA. Cells were re-stimulated in vitro with cognate antigen for 48 hours. Cells additionally stimulated with PMA and ionomycin for 2 hours for IL-13. Quantification of percent Th2 cells from five animals per group. Data are representative of two independent experiments. B) Percent of Th2 cells (Gata3<sup>+</sup> IL-13<sup>+</sup>) isolated from bone marrow chimeras reconstituted with a 50:50 mix of IL10Rβ<sup>+/+</sup> (Thy1.1<sup>+</sup>) or IL10Rβ<sup>-/-</sup> (Thy1.2<sup>+</sup>) cells nine days p.i. with SEA and re-stimulated in vitro with cognate antigen for 48 hours. Cells additionally stimulated with PMA and ionomycin for 2 hours for IL-13. Quantification of percent Th2 cells from five animals per group. Data are representative of two independent experiments.

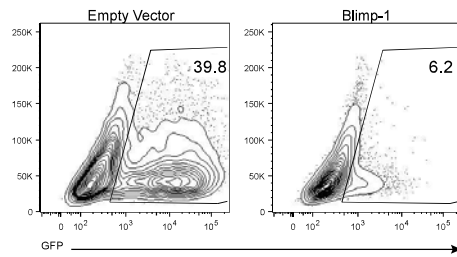

**Supplementary Figure 6: Transduction of Blimp-1 GFP-expressing retrovirus.**

Retroviral transduction of activated CD4 T cells with control retrovirus or Blimp-1 expressing retrovirus. GFP marks cells transduced with retrovirus. Data are representative of four independent experiments.

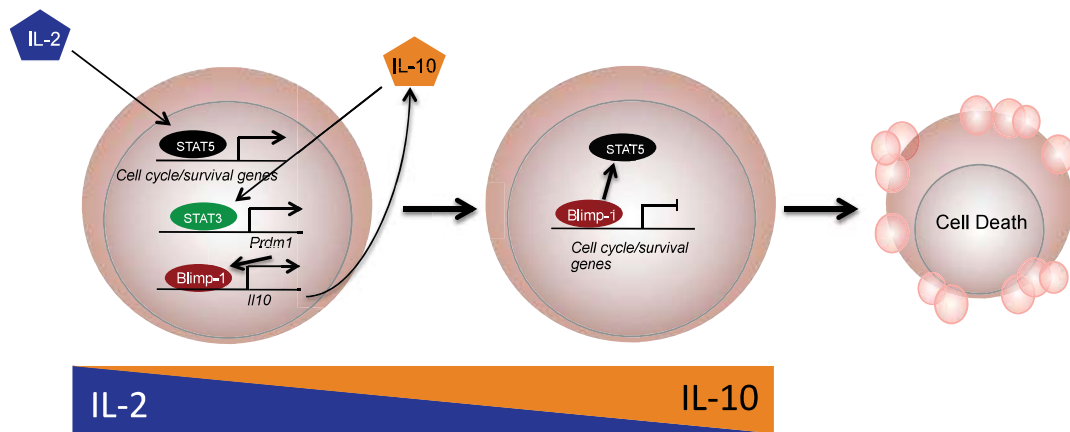

**Supplementary Figure 7: Model of IL-10–driven Blimp-1 expression via STAT3 in  $T_H2$  cells to promote cell death.**

Graphical model of IL-10 mediated Blimp-1 induction and Blimp-1 mediated cell death in Th2 cells.



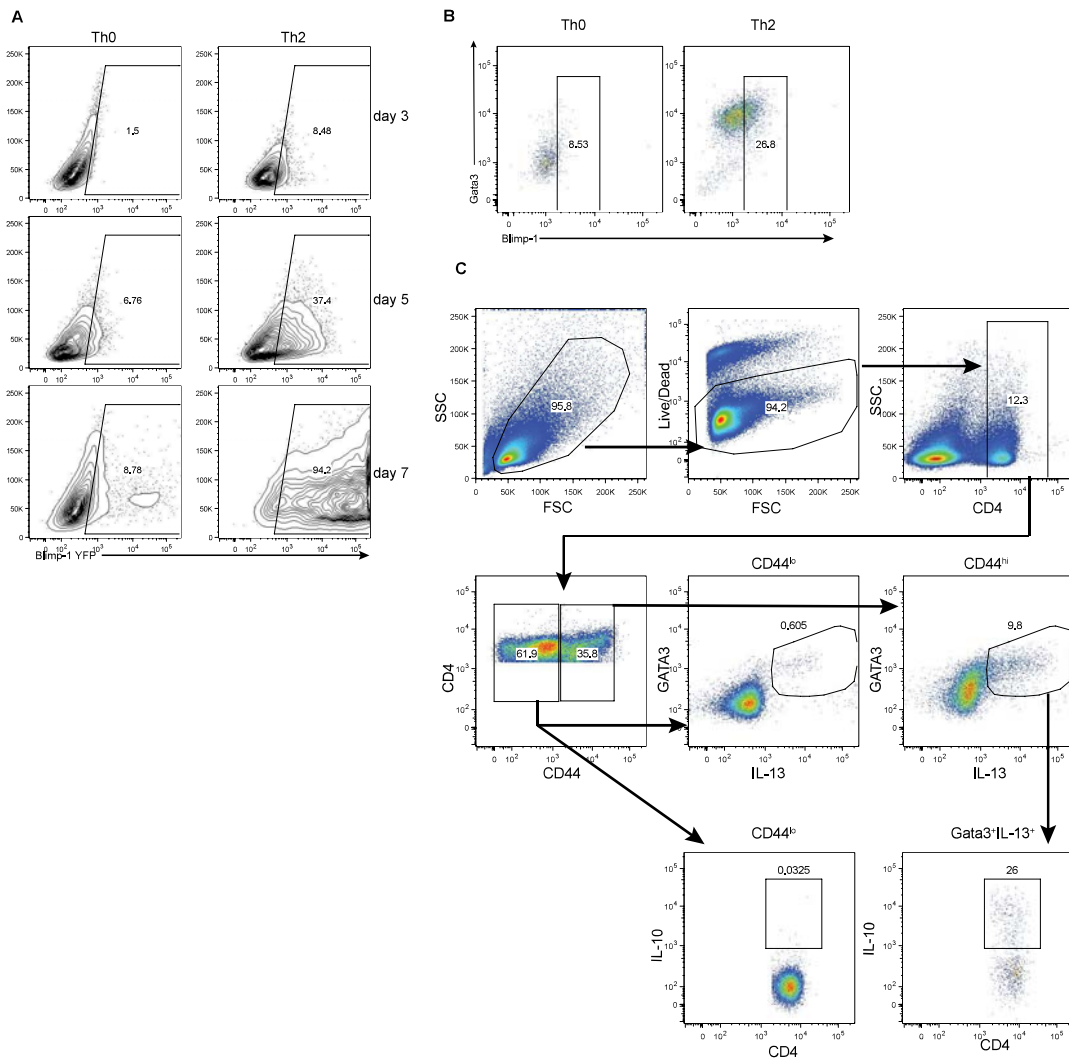

**Supplementary Figure 8: Representative gating strategies.**

A) Representative gating of Blimp-1 YFP positive cells. B) Representative gating of Blimp-1 staining. C) Representative gating strategy of Th2 effector cells (Gata3<sup>+</sup> IL-13<sup>+</sup>) and IL-10 staining in SEA in vivo experiments.

## Supplementary Tables

**Supplementary Table 1:** Flow cytometry antibodies.

| Antigen       | Clone     |
|---------------|-----------|
| CD4           | RM4-5     |
| CD44          | IM7       |
| CD62L         | MEL-14    |
| CD25          | PC61.5    |
| Blimp-1       | 5E7       |
| IL-10         | JES5-16E3 |
| IFN- $\gamma$ | XMG1.2    |
| Thy1.1        | OX7       |
| Thy1.2        | 53-2.1    |
| Gata3         | L50-823   |
| IL-13         | eBio13A   |
| h-NGFR        | ME20.5    |
| IL-10R        | 1B1.3A    |
| phospho-STAT3 | LUVNKLA   |

**Supplementary Table 2: Gene lists for GSEA analysis.**

**STAT5 Positively Regulated**

|               |               |         |               |          |               |
|---------------|---------------|---------|---------------|----------|---------------|
| Ecm1          | Ier3          | Trat1   | AI506816      | Puf60    | Ywhaz         |
| Ntn4          | Irgb3         | Grhpr   | Myh10         | Ydjc     | Gm2a          |
| D630039A03Rik | Rgcc          | Lss     | Fam114a2      | Lad1     | Bsg           |
| Hist1h4n      | Scd2          | Hilpda  | Pgap2         | Fdft1    | Nrn1          |
| Slc15a2       | Pim1          | Tpi1    | Nr4a2         | Trappc6a | Icos          |
| Gzmb          | Atp8b4        | Chchd10 | Stat4         | Ifi30    | Atp10d        |
| Hectd2        | Gm12250       | Slc2a1  | Sc5d          | Pfkip    | Hmgn5         |
| Mgarp         | Cpm           | Vat1    | Dhcr7         | P4ha1    | Serpinc1      |
| Stc2          | 4930483K19Rik | Il2ra   | Bnip3l        | Insig1   | Elf2          |
| Aldoc         | Ppic          | H2-Q6   | Gm12070       | Zdhhc18  | A130040M12Rik |
| Egln3         | Gpr65         | Gm5506  | Gm6981        | Hmgcr    | Dbi           |
| Socs2         | Serpnb6b      | St6gal1 | Stard4        | Psmb8    | Cdv3          |
| Akr1c18       | Arsb          | Mettl23 | Gm5069        | Slc39a10 | S100a11       |
| Slc16a3       | Apobec3       | Mt1     | Gapdh         | Odc1     | Galnt6        |
| Zhx2          | Sfn           | Tesc    | Gm5523        | Pmvk     | Iah1          |
| Cish          | Igfbp4        | Galk1   | Ar12bp        | Ttyh3    | Mndal         |
| Scd1          | Ankrd37       | Ncf1    | Ccr7          | Anxa6    | Tmem194b      |
| Gstt1         | Syce2         | Gbp5    | H2-K2         | Cndp2    | Stag3         |
| Prrg4         | Elov6         | Acsl3   | Nsdhl         | Slc25a1  | Atp7a         |
| Gm13546       | Hist1h4i      | Entpd4  | Sc4mol        | Ccr4     |               |
| Bnip3         | Tg            | Socs1   | Glo1          | Esyt1    |               |
| Fam71b        | Chrm4         | Pgk1    | Cblb          | Lonp1    |               |
| Ndrp1         | Farp1         | Gpi1    | Gm6498        | Aacs     |               |
| Stat5b        | Fdps          | Kbtbd11 | Sqle          | Higd1a   |               |
| Pdk1          | Crabp2        | Gm8909  | Dhcr24        | Cytip    |               |
| Rragd         | Runx3         | Mid1ip1 | 3000002C10Rik | Fabp5    |               |
| Asns          | 5830417I10Rik | Ldha    | Pced1b        | Pgd      |               |
| Ak4           | Mvd           | Pfkl    | Mpp1          | Hk1      |               |
| Arhgdig       | Gm4070        | Pgm2    | Mthfd1l       | Sigmar1  |               |
| Gprin3        | Hopx          | Notch2  | Gbp2          | Pgam1    |               |
| H2-Q2         | Ldlr          | Fosl2   | Egln1         | C2cd5    |               |
| Fads2         | Trmt1         | Ero1l   | Itga3         | Pcyt2    |               |
| Rgs11         | Tnfrsf9       | Slco4a1 | Ap3b1         | Rcsd1    |               |
| Trib3         | Hk2           | Acat2   | Tkt           | Ccnd2    |               |
| Vegfa         | Mov10         | Tmem97  | Idi1          | Rdh11    |               |
| Dnah8         | Eif4ebp1      | Aldoa   | Pim2          | Fam162a  |               |
| Rnaset2b      | Igtp          | Preli2  | Ady           | Myc      |               |
| Thy1          | Eno1          | Phgdh   | Nefh          | Slc7a5   |               |
| Pdzk1ip1      | Irf8          | Stat5a  | Cyp51         | Ctse     |               |
| Sirt3         | Asah1         | Pcgf5   | Ctla4         | Pmm1     |               |
| Ndrp2         | Wnt10b        | H2-Q10  | Sh3bp1        | Fam132a  |               |
| Tigit         | Bmyc          | Gsto1   | Gcat          | Jmjd6    |               |
| Gm129         | Dapl1         | Pkm     | Fam213a       | Rras2    |               |
| Socs3         | Nr4a3         | Nrp1    | Mif           | Serpnb6a |               |
|               | Stk39         | Ccl3    | Pop4          | Ndufv3   |               |

**STAT5 Negatively Regulated**

**Cell Cycle**

|               |               |               |               |          |        |
|---------------|---------------|---------------|---------------|----------|--------|
| Gm19757       | 6820431F20Rik | Ras111b       | Cd74          | Ab11     | Gpr132 |
| Bckdhb        | Nnt           | A930005H10Rik | Tsc22d1       | Atm      | Hus1   |
| Ikbke         | Ing4          | Sesn2         | Dsp           | Atr      | Itgb1  |
| Phyh          | Snhg6         | Xcl1          | Khdrbs3       | Aurka    | Mad211 |
| AA465934      | Tmc6          | Cd52          | Snhg9         | Aurkb    | Mcm2   |
| Xlra4b        | Lpxn          | Mxd4          | H2-T10        | Bcl2     | Mcm3   |
| Gm10845       | Ptp4a3        | Tmem19        | Myh7          | Birc5    | Mcm4   |
| Mmd           | Hcst          | H2-T9         | Napsa         | Brca1    | Mdm2   |
| Xlra4c        | Furin         | Ikzf3         | Mzb1          | Brca2    | Mki67  |
| Rab11fip4     | Il2           | Pdgfb         | Zfp383        | Casp3    | Mre11a |
| Bach2         | Ms4a6c        | Npas4         | Pik3r3        | Ccna1    | Msh2   |
| Sesn3         | S100a4        | Abhd4         | Vax2          | Ccna2    | Myb    |
| Cd5           | Rnf149        | Ldhd          | Ly6d          | Ccnb1    | Nbn    |
| Tfe3          | Aen           | Isg20         | Fcr11         | Ccnb2    | Nek2   |
| Mlf1          | Ext1          | Icam1         | Cib2          | Ccnc     | Notch2 |
| Pou2af1       | Tmem154       | Rbl2          | Pianp         | Ccnd1    | Pkd1   |
| Egr2          | Rxra          | Swap70        | Bcar3         | Ccnd2    | Pmp22  |
| Gypc          | Zfp862-ps     | Podn1         | Ccl1          | Ccnd3    | Ppm1d  |
| Hmg2          | Id3           | Slc38a6       | Kifc3         | Ccne1    | Rad17  |
| Cd37          | Penk          | Sap25         | Cd51          | Ccnf     | Rad21  |
| Pttg1         | Rbmx          | Mt2           | Maf           | Cdc20    | Rad51  |
| Rtfcd1        | Pdcd1         | Prkcdp        | Tdgf1         | Cdc25a   | Rad9a  |
| Fxyd5         | Stat1         | Lrrc28        | Gm5779        | Cdc25c   | Ran    |
| Tnfrsf14      | Hist2h2ac     | H2-Oa         | Scn1b         | Cdc6     | Rb1    |
| AI504432      | Cdk5rap1      | Spib          | Ccl22         | Cdc7     | Rbl1   |
| Cpne8         | Ercc1         | Twist1        | H2-DMb2       | Cdk1     | Rbl2   |
| Atp6v1d       | Rgs2          | Tnfsf4        | Ms4a1         | Cdk2     | Sfn    |
| Psap          | Ccng1         | Snn           | Cd79a         | Cdk4     | Shc1   |
| Axl           | Rgs1          | Lpar6         | Cd19          | Cdk5rap1 | Skp2   |
| Gimap9        | Ncoa7         | Fam212b       | H2-Eb1        | Cdk6     | Slfn1  |
| Rgs16         | Dcxr          | Sectm1a       | Rprl3         | Cdkn1a   | Smc1a  |
| Phf201        | Psrc1         | AI848285      | Fcer2a        | Cdkn1b   | Stag1  |
| Itm2a         | H2-Ab1        | Angptl2       | Rmrp          | Cdkn2a   | Stmn1  |
| 2810428115Rik | Ubxn11        | Spp1          | Cyp1a1        | Cdkn2b   | Terf1  |
| Chst2         | Pmaip1        | Sfi1          | Bcl2l15       | Cdkn3    | Tfdp1  |
| Dok2          | Glipr1        | Cd209c        | H2-Aa         | Chek1    | Trp53  |
| Ly6e          | Dusp6         | Mid1          | H2-DMb1       | Chek2    | Trp63  |
| Zfp3611       | Cdkn1a        | Rorc          | Ly86          | Cks1b    | Tsg101 |
| Tnfrsf13c     | Litaf         | 1500011B03Rik | 5830428M24Rik | Ddit3    | Wee1   |
| Map3k7        | Phlda3        | Rdh12         | Il17f         | Dst      |        |
| Tmc8          | Klh6          | Ramp1         | Tnfrsf19      | E2f1     |        |
| 1500012F01Rik | Rnf130        | Bcl6          | Gm12238       | E2f2     |        |
| Ypel3         | Cd96          | Cadm1         |               | E2f3     |        |
| Btg2          | Hist2h2bb     | Cxcr6         |               | E2f4     |        |
|               | Hist1h4m      | Nt5e          |               | Gadd45a  |        |

**Supplementary Table 3: ChIP-qPCR custom-designed SYBR primers.**

| <b>Primer</b>    | <b>Fwd (5'-3')</b>     | <b>Rev (5'-3')</b>     |
|------------------|------------------------|------------------------|
| Negative Control | GGGAACGACACTAACTATCC   | GAGCTATATGCCAGGATCTC   |
| SOCS3 TSS        | CGAGTGTAGAGTCAGAGTTAG  | CCTTTCAGTGCAGAGTAGT    |
| prdm1 +58        | TCGTGAACTAGGATGAGAAC   | AGAGTCAGCTTTCGGTAAA    |
| prdm1 +55        | GTCATGTGAAGCAGTGAAAT   | TCTTCGGCTCTTCTTGATC    |
| prdm1 +26        | CAACGAACTGAACAGTCAA    | TGAGTAGATAGATGTGAAAGGG |
| prdm1 +12        | CCTAAAGCTACCTGAGACTG   | GGGACTGATCTCATCTTTCA   |
| prdm1 +11        | CTATGGCCTCTGTACTTGTG   | CAGTGCCTCACTCTGTTATG   |
| prdm1 +10        | CTACGGTTTACTGTATCCTTGT | AGATGCTCAGGTTGAGAAAG   |
| prdm1 +9         | ACTCAGGATAACTCTCCATTC  | GTGGTTAGATGTGGACTACC   |
| prdm1 TSS        | ATACTGACGGTCTGATTCAC   | TAGTGTGGGTAACATGGAG    |
